# Supplementary material for: Predictors of the Behavioral Intention to Participate in Saiga Antelope Conservation among Chinese Young Residents
Source: MDPI journal article supplement (doi:10.3390/d14050411), 2022-05-23
Supplement: s1 [file s1]

## Questionnaire survey on saiga antelope conservation

Dear sir/madam:

Hello!

In order to understand the domestic society's perception of saiga antelope and optimize the saiga antelope conservation policies, we organized this survey. This questionnaire is anonymous, and the answers are neither good nor bad. The data obtained will be only used for academic research and will not cause any infringement or loss to you. Please try to choose the option that conforms to your real situation when you answer. Thank you for your support!

School of Economics and Management, Beijing Forestry University  
May, 2020

Please read the following material before completing the questionnaire:

There are three types of wildlife conservation activities in this questionnaire, that is, online, offline and donation activities. Online activities refer to forwarding relevant news, popularizing science articles and public service advertisements on the Internet calling for the boycott of illegal wildlife trade, and online supervision and reporting of illegal activities. Offline activities refer to participating in offline publicity, popularizing knowledge about saiga antelope conservation to people around, and participating in wildlife conservation in the field. Donation activities refer to donations for the purpose of conserving wildlife.

1. You have participated in wildlife conservation through online activities.  
never ☐ 1 ☐ 2 ☐ 3 ☐ 4 ☐ 5 extremely frequent
2. You have participated in wildlife conservation through offline activities.  
never ☐ 1 ☐ 2 ☐ 3 ☐ 4 ☐ 5 extremely frequent
3. You have participated in wildlife conservation through donation activities.  
never ☐ 1 ☐ 2 ☐ 3 ☐ 4 ☐ 5 extremely frequent
4. Saiga antelope has social value and is of great significance to education, culture and scientific research.  
extremely disagree ☐ 1 ☐ 2 ☐ 3 ☐ 4 ☐ 5 extremely agree
5. Saiga antelope has ecological value and plays an important role in maintaining the balance of ecosystem.  
extremely disagree ☐ 1 ☐ 2 ☐ 3 ☐ 4 ☐ 5 extremely agree
6. Participating in the conservation of saiga antelope is important and valuable.  
extremely disagree ☐ 1 ☐ 2 ☐ 3 ☐ 4 ☐ 5 extremely agree
7. Participating in the conservation of saiga antelope is interesting and gratifying.  
extremely disagree ☐ 1 ☐ 2 ☐ 3 ☐ 4 ☐ 5 extremely agree
8. Participating in online conservation activities has a positive effect on the conservation of saiga antelope.  
extremely disagree ☐ 1 ☐ 2 ☐ 3 ☐ 4 ☐ 5 extremely agree
9. Participating in offline conservation activities has a positive effect on the conservation of saiga antelope.  
extremely disagree ☐ 1 ☐ 2 ☐ 3 ☐ 4 ☐ 5 extremely agree

10. Participating in donation conservation activities has a positive effect on the conservation of saiga antelope.  
extremely disagree ☐ 1 ☐ 2 ☐ 3 ☐ 4 ☐ 5 extremely agree
11. You have the responsibility to participate in the conservation activities of saiga antelope.  
extremely disagree ☐ 1 ☐ 2 ☐ 3 ☐ 4 ☐ 5 extremely agree
12. People around you (family, friends, etc.) think that you should participate in the conservation of saiga antelope.  
extremely disagree ☐ 1 ☐ 2 ☐ 3 ☐ 4 ☐ 5 extremely agree
13. Policies, laws and regulations require that you should be involved in the conservation of saiga antelope.  
extremely disagree ☐ 1 ☐ 2 ☐ 3 ☐ 4 ☐ 5 extremely agree
14. People around you (family, friends, etc.) have participated in the conservation of saiga antelope.  
extremely disagree ☐ 1 ☐ 2 ☐ 3 ☐ 4 ☐ 5 extremely agree
15. The media is actively promoting saiga antelope conservation.  
extremely disagree ☐ 1 ☐ 2 ☐ 3 ☐ 4 ☐ 5 extremely agree
16. The government is actively conserving saiga antelope.  
extremely disagree ☐ 1 ☐ 2 ☐ 3 ☐ 4 ☐ 5 extremely agree
17. You find it not difficult to participate in online activities of saiga antelope conservation.  
extremely disagree ☐ 1 ☐ 2 ☐ 3 ☐ 4 ☐ 5 extremely agree
18. You find it not difficult to participate in offline activities of saiga antelope conservation.  
extremely disagree ☐ 1 ☐ 2 ☐ 3 ☐ 4 ☐ 5 extremely agree
19. You find it not difficult to participate in donation activities of saiga antelope conservation.  
extremely disagree ☐ 1 ☐ 2 ☐ 3 ☐ 4 ☐ 5 extremely agree
20. You are willing to participate in the online activities of saiga antelope conservation.  
extremely disagree ☐ 1 ☐ 2 ☐ 3 ☐ 4 ☐ 5 extremely agree
21. You are willing to participate in the offline activities of saiga antelope conservation.  
extremely disagree ☐ 1 ☐ 2 ☐ 3 ☐ 4 ☐ 5 extremely agree
22. You are willing to participate in the donation activities of saiga antelope conservation.  
extremely disagree ☐ 1 ☐ 2 ☐ 3 ☐ 4 ☐ 5 extremely agree
23. Which is the China Special Sign for Wildlife Management and Utilization?

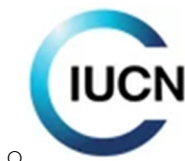
☐
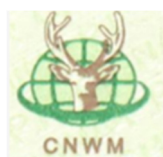
☐
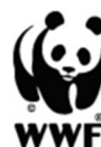

24. How many is the present population of saiga antelope in China?

- ☐About 200 ☐About 2 thousand ☐Not sure
25. Are there any wild populations of saiga antelope in China?  
☐Yes ☐No ☐Not sure
26. What is the protection level of saiga antelope in China?  
☐First-grade ☐Second-grade ☐Not sure
27. What is the international trade control level of saiga antelope?  
☐CITES Appendix I ☐CITES Appendix II ☐Not sure
28. What is your gender?  
☐Male ☐Female
29. Your age is \_\_\_\_.
30. What is your educational background (including in reading)?  
☐Junior high school and below ☐High school / junior college ☐Bachelor's degree  
☐Master's degree and above
31. What is your income in 2019?  
☐Less than 30,000 yuan ☐30,000-70,000 yuan ☐70,000-150,000 yuan ☐More than 150,000 yuan
